# Supplementary material for: Effect of sodium chloride on the structure and stability of spider silk's N-terminal protein domain
Source: Royal Society of Chemistry journal article supplement (doi:10.1039/c2bm00140c), 2013-01-01
Supplement: c2bm00140c.pdf [file c2bm00140c.pdf]

## **Supporting Material:**

### **Figures**

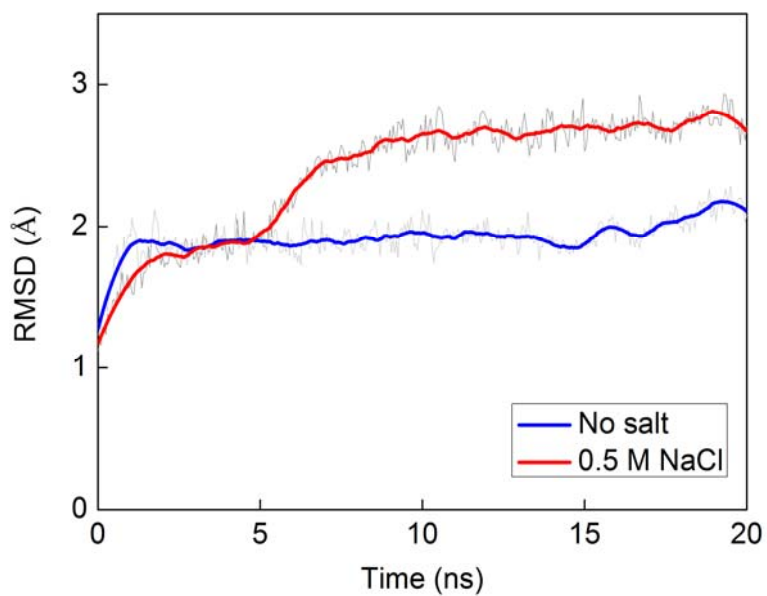

**Figure S1.** The RMSD of the full atomic model comparing against the initial conformation in equilibration process as a function of simulation time.

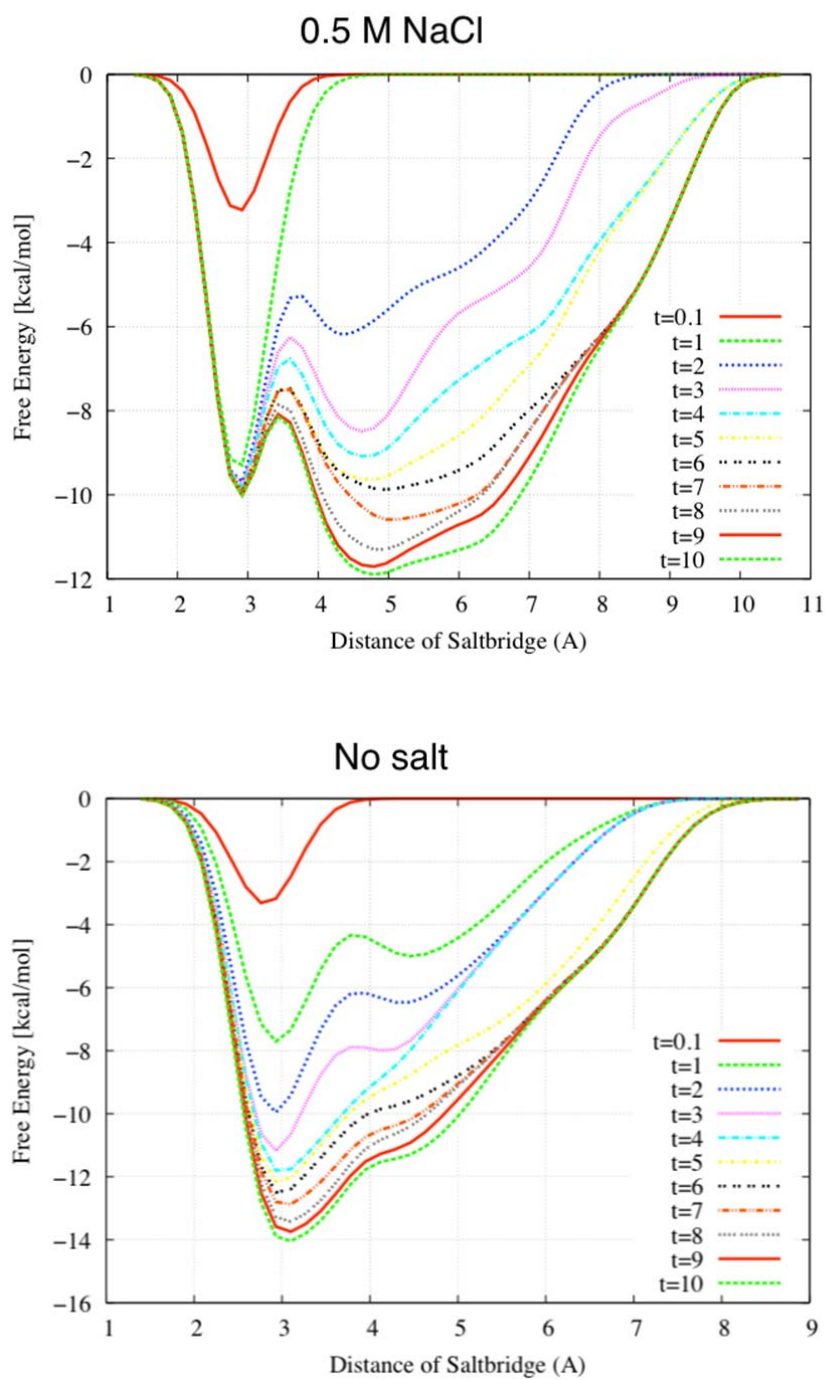

**Figure S2.** The evolution of the free-energy landscape with increasing time for non-salt and 0.5 M NaCl solvent conditions.

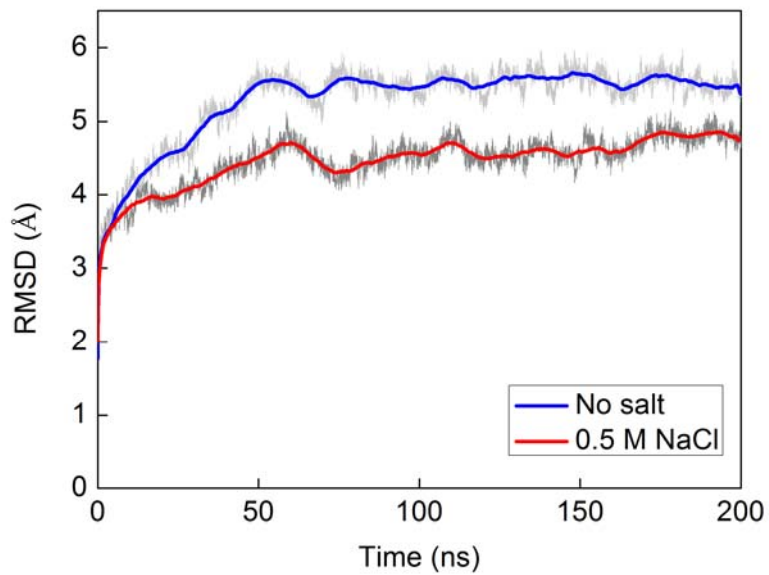

**Figure S3.** The RMSD of the coarse-grained model comparing against the initial conformation in equilibration process as a function of simulation time.

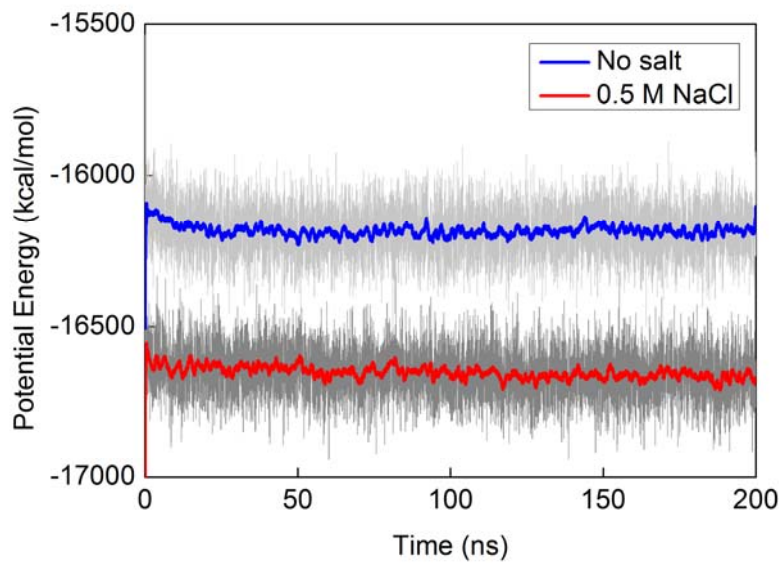

**Figure S4.** The potential energy of the coarse-grained model in equilibration process as a function of simulation time for different solvent conditions.
